# Supplementary material
Source: publisher figshare collection journal article supplement (https://karger.figshare.com/ndownloader/files/21696063)
Supplement: Supplementary file 1 [file 21696063]

**Supplementary Material**

**Serum Alkaline Phosphatase Level Predicts Cardiac Valve Calcification**

**in Maintenance Hemodialysis Patients**

**Blood Purification**

Jing Guo1*, Ming Zeng1*, Yanjuan Zhang2, Hui Huang3,Guang Yang1,Fangyan Xu1,

Wenkai Ren1,Jing Wang1, Yaoyu Huang1, Ningning Wang1#,Changying Xing1#

1  Department of Nephrology, The First Affiliated Hospital of Nanjing Medical University,

Jiangsu Province Hospital, Nanjing, People’s Republic of China

2  Department of Cardiology, The First Affiliated Hospital of Nanjing Medical University,

Jiangsu Province Hospital, Nanjing, People’s Republic of China

3 Department of Epidemiology and Biostatistics, School of Public Health,

Nanjing Medical University, Nanjing, People’s Republic of China

**Corresponding Authors :**

Changying Xing, Email: [cyxing62@126.com](mailto:cyxing62@126.com)

Ningning Wang, Email: wangnn@njmu.edu.cn

**Table S1** Components of the Global cardiac calcium scoring system [24]

| **Components** | **Score** |
| --- | --- |
| Posterior annulus | (by thirds, score 0–3) |
| Posterior mitral leaflet restriction | (0, 1) |
| Anterior mitral leaflet restriction | (0, 1 [valve opening on long-axis  view ≤10 mm]) |
| Mitral valve calcification (either leaflet) | (0, 1 [mild], 2 [greater than mild]) |
| Subvalvular apparatus calcification | (0, 1) |
| Aortic valve calcification | (0,1[nodule(s) in fewer than three leaflets], 2 [nodules in three leaflets but nonrestrictive], 3 [restrictive*]) |
| Aortic root calcification | (0, 1) |

|  |
| --- |

* Reduced motion of one or more leaflets or a meangradient ≥ 15 mm Hg

**
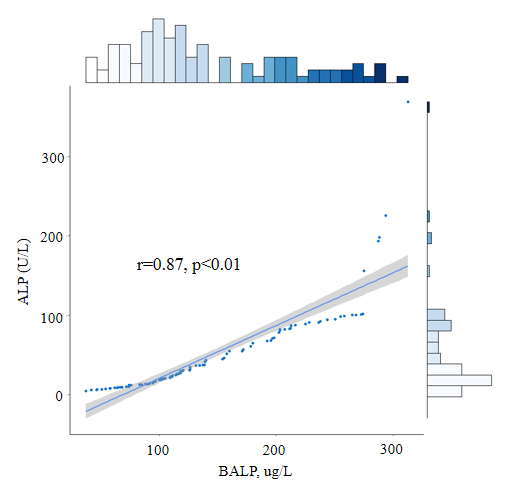
**

**Fig. S1** Correlations between serum concentration of ALP

and bone-specific alkaline phosphatase (BALP)
